# Supplementary material for: Safety and Angiographic Efficacy of Intra-Arterial Fibrinolytics as Adjunct to Mechanical Thrombectomy: Results from the INFINITY Registry
Source: PubMed Central journal article supplement — J Stroke. 2021 Jan 31;23(1):91–102. doi: 10.5853/jos.2020.01788 (PMC7900401; doi:10.5853/jos.2020.01788), 2021-01-31
Supplement: jos-2020-01788-suppl1.pdf [file jos-2020-01788-suppl1.pdf]

**Supplementary Table 1.** Logistic regression model (dependent variable symptomatic intracranial hemorrhage)

| Variable                                                          | aOR              | 95% CI           | P                |
|-------------------------------------------------------------------|------------------|------------------|------------------|
| IA UK vs. IA tPA                                                  | 0.53             | 0.27–1.04        | 0.064            |
| Age (per year increase)                                           | 1.01             | 0.97–1.05        | 0.727            |
| Female sex                                                        | 0.30             | 0.095–0.97       | 0.044*           |
| Admission NIHSS (per point increase)                              | 0.97             | 0.88–1.06        | 0.474            |
| Admission ASPECTS (per point increase)                            | 0.78             | 0.58–1.06        | 0.110            |
| Symptom-onset/last-seen well to reperfusion (per minute increase) | 1.00             | 0.99–1.00        | 0.580            |
| TICI (per grade increase)                                         | 0.43             | 0.20–0.94        | 0.035*           |
| History of diabetes                                               | 1.16             | 0.41–3.24        | 0.783            |
| History of coronary artery disease                                | 1.25             | 0.44–3.53        | 0.672            |
| <b>Anticoagulants</b>                                             |                  |                  |                  |
| No anticoagulants                                                 | Baseline         | Baseline         | Baseline         |
| Vitamin K antagonists                                             | 1.05             | 0.11–10.13       | 0.963            |
| Direct oral anticoagulants                                        | 3.08             | 0.55–17.28       | 0.201            |
| <b>Antiplatelet medication</b>                                    |                  |                  |                  |
| No antiplatelet medication                                        | Baseline         | Baseline         | Baseline         |
| Aspirin                                                           | 2.30             | 0.74–7.09        | 0.146            |
| Aspirin+other antithrombotic                                      | Did not converge | Did not converge | Did not converge |
| Admission imaging modality CT vs. MRI                             | 0.52             | 0.14–1.92        | 0.328            |
| IV tPA                                                            | 2.33             | 0.75–7.17        | 0.142            |
| <b>Site of intracranial occlusion</b>                             |                  |                  |                  |
| Intracranial ICA                                                  | Baseline         | Baseline         | Baseline         |
| M1                                                                | 0.27             | 0.08–0.86        | 0.026*           |
| M2                                                                | 0.29             | 0.07–1.14        | 0.077            |

M1/M2, first and second segment of the middle cerebral artery, respectively.

aOR, adjusted odds ratio; CI, confidence interval; IA, intra-arterial; UK, Urokinase; tPA, tissue plasminogen activator; NIHSS, National Institutes of Health Stroke Scale; ASPECTS, Alberta Stroke Program Early CT Score; TICI, thrombolysis in cerebral infarction; CT, computed tomography; MRI, magnetic resonance imaging; IV, intravenous; ICA, internal carotid artery.

\*P<0.05.

**Supplementary Table 2.** Risk of symptomatic intracranial hemorrhage with strata of prior antithrombotic and oral anticoagulant intake

|                                                           | No sICH    | sICH     |
|-----------------------------------------------------------|------------|----------|
| <b>Antiplatelet medication*</b>                           |            |          |
| No antiplatelet medication                                | 199 (91.7) | 18 (8.3) |
| Aspirin                                                   | 70 (88.6)  | 9 (11.4) |
| Aspirin+another antiplatelet medication (e.g., prasugrel) | 9 (100)    | 0 (0)    |
| P                                                         |            | 0.59     |
| <b>Oral anticoagulants†</b>                               |            |          |
| No oral anticoagulant medication                          | 126 (91.8) | 21 (8.2) |
| Vitamin K antagonists                                     | 22 (91.7)  | 2 (8.3)  |
| Direct oral anticoagulants                                | 21 (84.0)  | 4 (16.0) |
| P                                                         |            | 0.44     |

Values are presented as number (%). P-value calculated using Fisher's exact test. sICH, symptomatic intracranial hemorrhage.

\*Data available for 308 patients; †Data available for 309 patients.
