# Supplementary material for: Safety and Angiographic Efficacy of Intra-Arterial Fibrinolytics as Adjunct to Mechanical Thrombectomy: Results from the INFINITY Registry
Source: PubMed Central journal article supplement — J Stroke. 2021 Jan 31;23(1):91–102. doi: 10.5853/jos.2020.01788 (PMC7900401; doi:10.5853/jos.2020.01788), 2021-01-31
Supplement: jos-2020-01788-suppl2.pdf [file jos-2020-01788-suppl2.pdf]

**Supplementary Table 3.** Any angiographic reperfusion improvement with strata of initial reperfusion success and occlusion site

| Strata                       | Any angiographic reperfusion improvement |            | P    |
|------------------------------|------------------------------------------|------------|------|
|                              | -                                        | +          |      |
| TICI before IA fibrinolytics |                                          |            |      |
| 0                            | 8 (44.4)                                 | 10 (55.6)  | 0.21 |
| 1                            | 4 (40.0)                                 | 6 (60)     |      |
| 2a                           | 18 (37.5)                                | 30 (62.5)  |      |
| 2b                           | 82 (53.9)                                | 70 (46.1)  |      |
| Site of occlusion            |                                          |            |      |
| Intracranial ICA             | 19 (46.3)                                | 22 (53.7)  | 0.90 |
| M1                           | 64 (50.4)                                | 63 (49.6)  |      |
| M2                           | 29 (48.3)                                | 31 (51.7)  |      |
| Total                        | 112 (49.6)                               | 116 (50.9) |      |

Values are presented as number (%). M1/M2, first/second segment of the middle cerebral artery. P-value were calculated using Fisher's exact test. TICI, thrombolysis in cerebral infarction; IA, intra-arterial; ICA, internal carotid artery.

**Supplementary Table 4.** Logistic regression model (dependent variable mRS ≤2)

| Variable                                                          | aOR      | 95% CI     | P                  |
|-------------------------------------------------------------------|----------|------------|--------------------|
| IA UK vs. IA tPA                                                  | 1.35     | 0.87–2.98  | 0.178              |
| Age (per year increase)                                           | 0.94     | 0.91–0.96  | <0.001*            |
| Female sex                                                        | 0.58     | 0.28–1.21  | 0.148              |
| Admission NIHSS (per point increase)                              | 0.88     | 0.83–0.94  | <0.001*            |
| Admission ASPECTS (per point increase)                            | 1.05     | 0.84–1.31  | 0.686              |
| Symptom-onset/last-seen well to reperfusion (per minute increase) | 0.99     | 0.99–1.00  | 0.087              |
| TICI (per grade increase)                                         | 2.36     | 1.26–4.13  | 0.007*             |
| History of diabetes                                               | 0.38     | 0.16–0.91  | 0.030 <sup>†</sup> |
| History of coronary artery disease                                | 0.22     | 0.10–0.49  | <0.001*            |
| Anticoagulants                                                    |          |            |                    |
| No anticoagulants                                                 | Baseline | Baseline   | Baseline           |
| Vitamin K antagonists                                             | 0.88     | 0.22–3.46  | 0.855              |
| Direct oral anticoagulants                                        | 0.09     | 0.01–0.56  | 0.009*             |
| Antiplatelet medication                                           |          |            |                    |
| No antiplatelet medication                                        | Baseline | Baseline   | Baseline           |
| Aspirin                                                           | 1.05     | 0.45–2.43  | 0.918              |
| Aspirin+other antithrombotic                                      | 1.28     | 0.21–7.67  | 0.791              |
| Admission imaging modality CT vs. MRI                             | 2.38     | 0.99–5.68  | 0.051              |
| IV tPA                                                            | 1.35     | 0.63–2.87  | 0.442              |
| Site of intracranial occlusion                                    |          |            |                    |
| Intracranial ICA                                                  | Baseline | Baseline   | Baseline           |
| M1                                                                | 1.99     | 0.73–5.44  | 0.175              |
| M2                                                                | 5.22     | 1.67–16.27 | 0.004*             |

M1/M2, first and second segment of the middle cerebral artery, respectively.

mRS, modified Rankin Scale; aOR, adjusted odds ratio; CI, confidence interval; IA, intra-arterial; UK, urokinase; tPA, tissue plasminogen activator; NIHSS, National Institutes of Health Stroke Scale; ASPECTS, Alberta Stroke Program Early CT Score; TICI, thrombolysis in cerebral infarction; IV, intravenous; ICA, internal carotid artery.

\*P<0.01; <sup>†</sup>P<0.05.
